# Supplementary material for: Polysaccharide zeta-potentials and protein-affinity
Source: Royal Society of Chemistry journal article supplement (doi:10.1039/c7cp02641b), 2017-01-01
Supplement: c7cp02641b1.pdf [file c7cp02641b1.pdf]

Electronic Supplementary Information (ESI) for Physical Chemistry Chemical Physics

**Polysaccharide Zeta-potentials and Protein-affinity**

*Fatih Comert*<sup>†</sup>, *Fatemeh Azarikia*<sup>‡</sup>, and *Paul L. Dubin*<sup>†\*</sup>

<sup>†</sup> Department of Chemistry, University of Massachusetts Amherst, 710 North Pleasant Street, Amherst, Massachusetts 01003, United States

<sup>‡</sup> Department of Food Science & Technology, Faculty of Agriculture, Tarbiat Modares University, P.O. Box 14115-336, Tehran, Iran

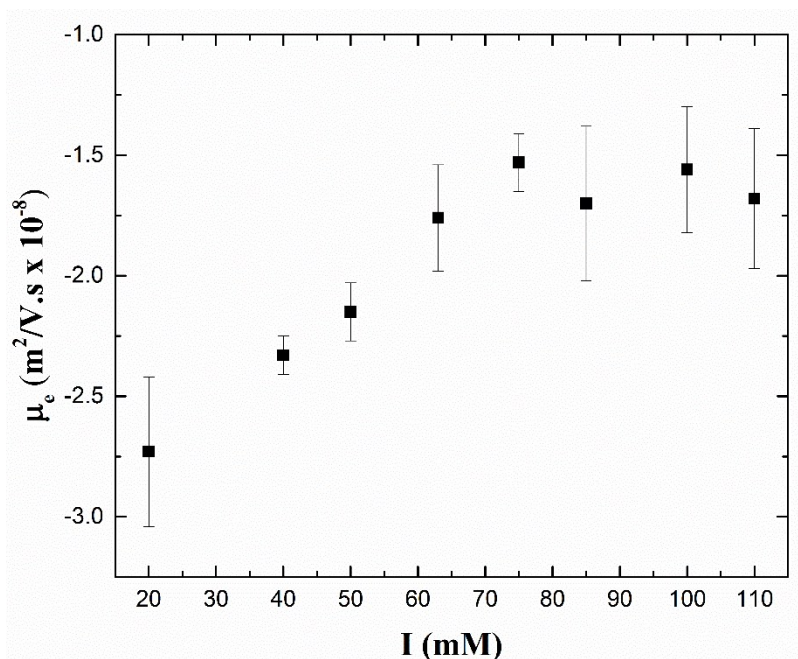

**Figure S1.** The ionic strength ( $I$ ) dependence of electrophoretic mobility ( $\mu_e$ ) of HA at pH 6.2.
